# Supplementary material for: Reduced enteric methane emissions alters carbon isotope ratio of animal-derived products
Source: Research Square preprint supplement (doi:10.21203/rs.3.rs-8168311/v1), 2026-01-19
Supplement: Supplementary file 2 [file c5040cb456c4e21ef100efe2.xlsx]

## Sheet: Supplementary Table S1
Treatment	Total dietary intake (gDM/day)	Dietary C intake (gC/day)a	Digestible C fraction (F) (%)b	Digestible C intake (gC/day)	Methane emissions (gCH4/day)	Methane carbon loss (gC/day)	Proportion digestible C lost as methane (M) (%)	d13C of diet (‰)c	d13C of feaeces (‰)c, d	d13C of digestible C (‰)e	d13C of methane (‰)f	d13C of retained C (‰)g	Predicted difference from control (calculated)	Dwool oberved difference from control (‰)c	Dplasma oberved difference from control (‰)c	Dfluid oberved difference from control (‰)c
Example – Control	1700	731	0.65	475.15	31.5	23.625	0.0497211	-28	-29	-27.4615	-68.97	-25.2897	0
Example – Abated	1700	731	0.65	475.15	15.75	11.8125	0.0248606	-28	-29	-27.4615	-68.97	-26.4033	-1.1136
Control	1750	752.5	0.65	489.125	29.2455	21.9342	0.0448437	-28.33	-29.3365	-27.788	-69.2703	-25.8405	0	0	0	0
Low	1680	722.4	0.65	469.56	21.986	16.4895	0.0351169	-28.33	-29.3911	-27.7586	-69.2703	-26.2478	-0.407341	-0.532522	-0.423699	-0.6
Mid	1690	726.7	0.65	472.355	18.2344	13.6758	0.0289524	-28.33	-29.3633	-27.7736	-69.2703	-26.5364	-0.695882	-0.527673	-0.272767	-0.598
High	1660	713.8	0.65	463.97	13.274	9.95548	0.0214572	-28.33	-29.4442	-27.7301	-69.2703	-26.8192	-0.978718	-0.939275	-0.649307	-0.656
a Multiube diet 43% C by weight (Supplementary Table S4)
b Dry Matter Digestibility 65% (Supplementary Table S1)
c Carbon isotope ratios of trial diet and trial tissues measured in this study (Table 2 and Supplementary Table S4)
d In example calculations, carbon isotope ratios of faeces estimated as -1‰ relative to diet.
e Calculated using Equation 3
f Calculated relative to diet d13C following Chang et al. (2019)
g Calculated using Equation 4
