# Supplementary material for: Reduced enteric methane emissions alters carbon isotope ratio of animal-derived products
Source: Research Square preprint supplement (doi:10.21203/rs.3.rs-8168311/v1), 2026-01-19
Supplement: Supplementary file 3 [file ff517aae7609d175175b4b2c.xlsx]

## Sheet: Explanation of terms
Supplementary Table S5: Carbon isotope ratios and methane emissions data
Please cite:
McInerney et al., "Reduced enteric methane emissions alters carbon isotope ratio of animal materials "
Variable	Column headings (string format)	Description	Source of values
Animal ID 1	Animal_ID	Identifier of animal by treatment group and numbered in order of VID	Assigned
Animal ID 2	VID	Idenfitier of animal by Chiswick Farm tracking system	Assigned
Animal ID 3	EID	Amimal Radio Frequency Identification (RFID) tag number	Assigned
Treatment group	Treatment	Experimental treatment group: Control, Low, Mid, High	Assigned
Baseline d13Cdiet	Diet_BSLN	Carbon isotope ratio of diet for the baseline phase (‰)	Average of 3 replicate measurements of a hay cube sample from the start of the baseline phase
Experimental d13Cdiet	Diet_EXPT	Carbon isotope ratio of diet for the experimental phase (‰)	Average of 2 replicate measurements of 28 hay cube samples collected throughout the experimental phase
Baseline d13Cwool	Wool_d13C_BSLN	Carbon isotope ratio of wool for the baseline phase (‰)	Average of 2 to 3 replicate measurements of each wool sample from the baseline phase
Experimental d13Cwool	Wool_d13C_EXPT	Carbon isotope ratio of wool for the experimental phase (‰)	Average of 2 to 3 replicate measurements of each wool sample from the experimental phase
Baseline Dwool	Wool_minus_Diet_BSLN	Wool-diet offset (Dwool) for the baseline phase (‰)	Calculated as the difference between the carbon isotope ratios of wool and diet for the baseline phase
Experimental Dwool	Wool_minus_Diet_EXPT	Wool-diet offset (Dwool) for the experimental phase (‰)	Calculated as the difference between the carbon isotope ratios of wool and diet for the experimental phase
Baseline d13Cplasma	Plasma_d13C_BSLN	Carbon isotope ratio of plasma for the baseline phase (‰)	Average of 2 to 3 replicate measurements of each plasma sample from the baseline phase
Experimental d13Cplasma	Plasma_d13C_EXPT	Carbon isotope ratio of plasma for the experimental phase (‰)	Average of 2 to 3 replicate measurements of each plasma sample from the experimental phase
Baseline Dplasma	Plasma_minus_Diet_BSLN	Plasma-diet offset (Dplasma) for the baseline phase (‰)	Calculated as the difference between the carbon isotope ratios of plasma and diet for the baseline phase
Experimental Dplasma	Plasma_minus_Diet_EXPT	Plasma-diet offset (Dplasma) for the experimental phase (‰)	Calculated as the difference between the carbon isotope ratios of plasma and diet for the experimental phase
Baseline d13Cfaeces	Faecal_d13C_BSLN	Carbon isotope ratio of faeces for the baseline phase (‰)	Average of 2 to 3 replicate measurements of each faeces sample from the baseline phase
Experimental d13Cfaeces	Faecal_d13C_EXPT	Carbon isotope ratio of faeces for the experimental phase (‰)	Average of 2 to 3 replicate measurements of each faeces sample from the experimental phase
Baseline Dfaeces	Faeces_minus_Diet_BSLN	Faeces-diet offset (Dfaeces) for the baseline phase (‰)	Calculated as the difference between the carbon isotope ratios of faeces and diet for the baseline phase
Experimental Dfaeces	Faeces_minus_Diet_EXPT	Faeces-diet offset (Dfaeces) for the experimental phase (‰)	Calculated as the difference between the carbon isotope ratios of faeces and diet for the experimental phase
Experimental d13Cfluid	Rfluid_d13C_EXPT	Carbon isotope ratio of rumen fluid for the experimental phase for animals with >80% dry matter intake on the day of sampling (‰)	Average of 2 to 3 replicate measurements of each rumen fluid sample from the experimental phase
Experimental Dfluid	Rfluid_minus_Diet_EXPT	Rumen-fluid–diet offset (Dfluid) for the experimental phase (‰)	Calculated as the difference between the carbon isotope ratios of rumen fluid and diet for the experimental phase
Experimental d13Cpellet	Rpellet_d13C_EXPT	Carbon isotope ratio of rumen fluid for the experimental phase for animals with >80% dry matter intake on the day of sampling (‰)	Average of 2 to 3 replicate measurements of each rumen pellet sample from the experimental phase
Experimental Dpellet	Rpellet_minus_Diet_EXPT	Rumen-pellet–diet offset (Dfluid) for the experimental phase (‰)	Calculated as the difference between the carbon isotope ratios of rumen pellet and diet for the experimental phase
Baseline methane production	CH4_g_day_BSLN	Methane production for the baseline phase for animals with >60% dry matter intake while in chamber (g CH4/day)	Average methane production from 1-3 days of measurement in respiration chambers during the baseline phase
Baseline DMI	DMI_BSLN	Dry matter intake while in respiration chamber during the baseline phase for animals with >60% dry matter intake while in chamber (Kg/day)	Average dry matter intake from 1-3 days while in respiration chambers during the baseline phase
Baseline methane yield	CH4_g_kg_DMI_BSLN	Methane yield for the baseline phase for animals with >60% dry matter intake while in chamber (g CH4/Kg DMI)	Average methane production divided by average dry matter intake while in respriation chambers during the baseline phase
Experimental methane production	CH4_g_day_EXPT	Methane emissions for the experimental phase for animals with >60% dry matter intake while in chamber (g CH4/day)	Average methane production from 1-3 days of measurement in respiration chambers during the experimental phase
Experimental DMI	DMI_EXPT	Dry matter intake while in respiration chamber during the experimental phase for animals with >60% dry matter intake while in chamber (Kg/day)	Average dry matter intake from 1-3 days while in respiration chambers during the experimental phase
Experimental methane yield	CH4_g_kg_DMI_EXPT	Methane yield for the experimental phase for animals with >60% dry matter intake while in chamber (g CH4/Kg DMI)	Average methane production divided by average dry matter intake while in respriation chambers during the experimental phase

## Sheet: Supplementary Table S6
Animal ID 1	Animal ID 2	Animal ID 3	Treatment group	Baseline d13Cdiet	Experimental d13Cdiet	Baseline d13Cwool	Experimental d13Cwool	Baseline Dwool	Experimental Dwool	Baseline d13Cplasma	Experimental d13Cplasma	Baseline Dplasma	Experimental Dplasma	Baseline d13Cfaeces	Experimental d13Cfaeces	Baseline Dfaeces	Experimental Dfaeces	Experimental d13Cfluid	Experimental Dfluid	Experimental d13Cpellet	Experimental Dpellet	Baseline methane production	Baseline DMI	Baseline methane yield	Experimental methane production	Experimental DMI	Experimental methane yield
Animal_ID	VID	EID	Treatment	Diet_BSLN	Diet_EXPT	Wool_d13C_BSLN	Wool_d13C_EXPT	Wool_minus_Diet_BSLN	Wool_minus_Diet_EXPT	Plasma_d13C_BSLN	Plasma_d13C_EXPT	Plasma_minus_Diet_BSLN	Plasma_minus_Diet_EXPT	Faecal_d13C_BSLN	Faecal_d13C_EXPT	Faeces_minus_Diet_BSLN	Faeces_minus_Diet_EXPT	Rfluid_d13C_EXPT	Rfluid_minus_Diet_EXPT	Rpellet_d13C_EXPT	Rpellet_minus_Diet_EXPT	CH4_g_day_BSLN	DMI_BSLN	CH4_g_kg_DMI_BSLN	CH4_g_day_EXPT	DMI_EXPT	CH4_g_kg_DMI_EXPT
Control1	22C8759	940 110024281839	Control	-29.01	-28.33	-26.23	-25.58	2.78	2.75	-25.1105	-24.6382	3.8995	3.69176	-28.35	-29.44	0.66	-1.11	-27.95	0.38	-27.56	0.77	30.4139	1.3665	22.3774	30.4055	1.50892	20.1584
Control2	22C8935	940 110024281955	Control	-29.01	-28.33	-26.19	-25.41	2.81	2.92	-25.3355	-24.7186	3.67454	3.61138	-28.59	-29.47	0.42	-1.14	-27.84	0.49	-28.15	0.18	22.3646	1.362	16.4204
Control3	22C9008	940 110024281888	Control	-29.01	-28.33	-26.36	-25.77	2.65	2.56	-25.3196	-24.8107	3.69037	3.51935	-28.65	-29.42	0.36	-1.09
Control4	22C9098	940 110024281398	Control	-29.01	-28.33	-26.49	-25.35	2.51	2.98	-25.1937	-24.7223	3.8163	3.60774	-28.63	-28.99	0.38	-0.66
Control5	22C9110	940 110024281390	Control	-29.01	-28.33	-26.88	-25.54	2.12	2.79	-25.3046	-24.8199	3.70542	3.51005	-28.66	-29.45	0.35	-1.12	-28.5	-0.17	-28.02	0.31	21.0325	1.269	16.6548	27.3696	1.18421	23.1102
Control6	22C9118	940 110024281378	Control	-29.01	-28.33	-27.08	-25.73	1.93	2.6	-25.2538	-24.7617	3.75615	3.5683	-28.54	-29.26	0.47	-0.93	-27.91	0.42	-27.42	0.91	32.8503	1.691	19.4265	29.9616	1.30196	23.1803
Low1	22C8779	940 110024281819	Low	-29.01	-28.33	-26.03	-25.9	2.98	2.43	-25.1149	-25.0836	3.89507	3.24641	-29.05	-29.5	-0.04	-1.17	-28.24	0.09	-28.43	-0.1	26.1782	1.345	19.6497	17.2255	1.18495	14.5369
Low2	22C8843	940 110024280843	Low	-29.01	-28.33	-26.14	-26.15	2.87	2.18	-25.3594	-25.3295	3.65057	3.00049	-28.77	-29.37	0.24	-1.04	-28.81	-0.48	-29.35	-1.02	24.6936	1.329	18.5806
Low3	22C8863	940 110024280823	Low	-29.01	-28.33	-26.51	-25.87	2.5	2.46	-25.2236	-25.1664	3.78643	3.1636	-28.74	-29.39	0.27	-1.06	-28.62	-0.29	-28.49	-0.16	27.3837	1.536	17.8279	23.9327	1.38828	17.2391
Low4	22C8878	940 110024280818	Low	-29.01	-28.33	-26.31	-26.22	2.7	2.11	-25.172	-25.0676	3.838	3.26239	-28.99	-29.29	0.02	-0.96					20.8848	1.102	18.9517
Low5	22C9006	940 110024281886	Low	-29.01	-28.33	-26.3	-25.98	2.71	2.35	-25.3528	-25.2139	3.65725	3.11608	-28.6	-29.34	0.41	-1.01	-28.93	-0.6	-27.63	0.7	35.6507	1.6365	21.7697	24.7997	1.25039	19.8335
Low6	22C9169	940 110024280929	Low	-29.01	-28.33	-26.36	-26.45	2.64	1.88	-25.1908	-25.1526	3.81919	3.17743	-28.69	-29.45	0.32	-1.12
Mid1	22C8872	940 110024280812	Mid	-29.01	-28.33	-25.85	-25.95	3.15	2.38	-25.2846	-25.007	3.72537	3.32304	-28.88	-29.37	0.13	-1.04	-27.91	0.42	-27.96	0.37	28.3317	1.698	16.7069	17.9341	1.41026	12.7169
Mid2	22C8983	940 110024281903	Mid	-29.01	-28.33	-26.16	-25.73	2.85	2.6	-25.2268	-24.9317	3.7832	3.3983	-28.61	-29.33	0.39	-1	-29.05	-0.72	-27.99	0.34	27.7478	1.326	20.9259
Mid3	22C9034	940 110024281454	Mid	-29.01	-28.33	-26.2	-26.09	2.81	2.24	-25.1946	-25.0726	3.81544	3.25737	-28.76	-29.22	0.25	-0.89	-28.62	-0.29	-27.92	0.41	20.4799	1.0655	19.42	18.5347	1.10713	16.7746
Mid4	22C9057	940 110024281437	Mid	-29.01	-28.33	-26.66	-26.29	2.34	2.04	-25.3892	-25.081	3.62084	3.19798	-28.68	-29.47	0.32	-1.14	-28.93	-0.6	-26.89	1.44	30.2306	1.461	20.6917
Mid5	22C9187	940 110024280907	Mid	-29.01	-28.33	-26.59	-26.32	2.42	2.01	-25.2566	-25.0507	3.75339	3.27927	-28.78	-29.39	0.23	-1.06	-28.73	-0.4	-27.95	0.38
Mid6	22C9192	940 110024280892	Mid	-29.01	-28.33	-26.5	-26.16	2.51	2.17	-25.1796	-24.965	3.83044	3.36502	-28.96	-29.4	0.05	-1.07
High1	22C8967	940 110024281927	High	-29.01	-28.33	-26.3	-26.24	2.71	2.09	-25.2442	-25.426	3.76583	2.90405	-28.73	-29.45	0.28	-1.12	-28.42	-0.09	-28.06	0.27	25.7296	1.0875	23.696	11.7131	1.16439	10.1049
High2	22C9014	940 110024281874	High	-29.01	-28.33	-26.75	-26.56	2.26	1.77	-25.4968	-25.5186	3.51318	2.81139	-28.9	-29.49	0.11	-1.16	-28.78	-0.45	-28.37	-0.04	22.9978	1.403	16.3919	11.7707	1.43432	8.20646
High3	22C9032	940 110024281452	High	-29.01	-28.33	-26.77	-26.8	2.23	1.53	-25.2757	-25.3704	3.73434	2.95961	-28.89	-29.34	0.12	-1.01	-28.37	-0.04	-28.55	-0.22	30.9309	1.6195	19.1255	16.3382	1.27549	12.8516
High4	22C9066	940 110024281426	High	-29.01	-28.33	-26.54	-26.95	2.46	1.38	-25.3184	-25.4059	3.69156	2.84823	-29.02	-29.44	-0.02	-1.11	-28.89	-0.56	-28.01	0.32	31.5106	1.4705	21.4248
High5	22C9094	940 110024281394	High	-29.01	-28.33	-26.76	-26.16	2.24	2.17	-25.4365	-25.3302	3.57346	2.99982	-28.74	-29.51	0.27	-1.18	-29.07	-0.74	-27.88	0.45	32.3514	1.494	21.6542
High6	22C9165	940 110024280925	High	-29.01	-28.33	-26.83	-26.3	2.18	2.03	-25.205	-25.3162	3.80499	3.01377	-28.79	-29.43	0.21	-1.1					23.0997	1.12	20.6247
